# Supplementary material for: An Economic Evaluation of the Relationship Between Glycemic Control and Total Healthcare Costs for Adults with Type 2 Diabetes: Retrospective Cohort Study
Source: Springer Nature journal article supplement (doi:10.1007/s13300-023-01507-0), 2023-12-01
Supplement: MOESM1 [file 26479370]

## **An Economic Evaluation of The Relationship Between Glycemic Control and Total Healthcare Costs for Adults with Type 2 Diabetes: Retrospective Cohort Study**

Kristina S Boye, PhD<sup>A</sup>  
Jay P Bae, PhD<sup>B</sup>  
Vivian T Thieu, PhD<sup>C</sup>  
Maureen J Lage, PhD<sup>D</sup>

A – Eli Lilly and Company, Lilly Corporate Center, Indianapolis, IN, 46225, USA. E-Mail: boye\_kristina\_secnik@lilly.com. ORCID ID: 0000-0002-5935-5929.

B – Eli Lilly and Company, Lilly Corporate Center, Indianapolis, IN 46225, USA. E-Mail: bae\_jay@lilly.com. ORCID ID: 0000-0002-2322-1450.

C – Eli Lilly and Company, Lilly Corporate Center, Indianapolis, IN, 46225, USA. E-Mail: thieu\_vivian\_thuyanh@lilly.com.

D – Corresponding Author. HealthMetrics Outcomes Research, 17 Benton's Knoll, Guilford, CT, 06437, USA. E-Mail: lagemj@hlthmetrics.com. ORCID ID: 0000-0003-4961-2027.

**Supplemental Table 1**  
**Propensity Score Matching**  
**Odds of Index HbA1c < 7%**

|                                                  | <b>Odds Ratio</b> | <b>95% Confidence Interval</b> | <b>Standard Difference<sup>A</sup></b> |
|--------------------------------------------------|-------------------|--------------------------------|----------------------------------------|
| Age                                              | 1.02              | 1.02 - 1.03                    | 0.16                                   |
| Male                                             | 0.83              | 0.80 - 0.85                    | -0.07                                  |
| Asian                                            | 0.93              | 0.84 - 1.03                    | 0.01                                   |
| African-American                                 | 0.91              | 0.87 - 0.95                    | 0.02                                   |
| Race Other/Unknown                               | 0.95              | 0.90 - 1.00                    | 0.01                                   |
| Hispanic                                         | 0.73              | 0.69 - 0.78                    | -0.02                                  |
| Ethnicity Unknown                                | 0.89              | 0.84 - 0.93                    | 0.01                                   |
| Midwest                                          | 1.00              | 0.96 - 1.04                    | -0.06                                  |
| Northeast                                        | 0.99              | 0.94 - 1.04                    | 0.03                                   |
| West                                             | 1.04              | 0.99 - 1.10                    | 0.01                                   |
| Year of Index Date                               | 0.99              | 0.98 - 1.01                    | 0.04                                   |
|                                                  |                   |                                |                                        |
|                                                  |                   |                                |                                        |
|                                                  |                   |                                |                                        |
| Ratio of Variance of Propensity Score            | 1.05              |                                |                                        |
| Standardized Difference of Mean Propensity Score | 0.16              |                                |                                        |

A - Standardized difference of covariate of interest for individuals with HbA1c < 7% and individuals with HbA1c ≥ 7% after propensity score matching.
